# Supplementary material for: Transcriptome Analysis of the Brown Planthopper Nilaparvata lugens
Source: PLoS One. 2010 Dec 6;5(12):e14233. doi: 10.1371/journal.pone.0014233 (PMC2997790; doi:10.1371/journal.pone.0014233)
Supplement: Table S5 — Top ten differentially expressed genes in each library of comparisons. (0.16 MB DOC) [file pone.0014233.s005.doc]

**Table S5. Top ten differentially expressed genes in each library of comparisons.**

| **Comparison** | **Unigene**  **ID** | **Hit Number** | **Discription** | **FDR** | **Fold Change** |
| --- | --- | --- | --- | --- | --- |
| **2nd instar /eggs** | **NL30534a** | **-** | **-** | **0** | **16.34** |
| **NL00492a** | **gi|23393789|gb|AAN31393.1|** | **fatty acyl-CoA desaturase [*Musca domestica*]** | **0** | **16.13** |
| **NL06133a** | **gi|118794438|ref|XP_321477.2|** | **AGAP001622-PA [*Anopheles gambiae str.* PEST]** | **0** | **15.21** |
| **NL21346a** | **-** | **-** | **0** | **14.86** |
| **NL14843a** | **gi|51557683|gb|AAU06481.1|** | **rhodopsin [*Culicoides sonorensis*]** | **0** | **14.68** |
| **NL09563a** | **gi|194753464|ref|XP_001959032.1|** | **GF12674 [*Drosophila ananassae*]** | **0** | **14.39** |
| **NL00840a** | **gi|193636528|ref|XP_001947537.1|** | **PREDICTED: similar to soldier-specific protein-1 [*Acyrthosiphon pisum*]** | **0** | **13.91** |
| **NL19783a** | **gi|170052387|ref|XP_001862198.1|** | **opsin-1 [*Culex quinquefasciatus*]** | **0** | **13.89** |
| **NL27165a** | **-** | **-** | **0** | **13.86** |
| **NL12501a** | **-** | **-** | **0** | **13.79** |
| **NL00339b** | **gi|228015381|ref|YP_002836171.1|** | **ATP synthase F0 subunit 6 [*Geisha distinctissima*]** | **0** | **-3.29** |
| **NL08961b** | **gi|240266564|ref|YP_002970935.1|** | **NADH dehydrogenase subunit 5 [*Lycorma delicatula*]** | **0** | **-2.57** |
| **NL22255b** | **-** | **-** | **0** | **-2.39** |
| **NL01131b** | **gi|270013489|gb|EFA09937.1|** | **hypothetical protein TcasGA2_TC012090 [*Tribolium castaneum*]** | **0** | **-2.27** |
| **NL09289b** | **-** | **-** | **0** | **-1.98** |
| **NL00317b** | **-** | **-** | **0** | **-1.52** |
| **NL27253b** | **-** | **-** | **0** | **-1.49** |
| **NL04919b** | **gi|156546614|ref|XP_001602649.1|** | **PREDICTED: similar to ENSANGP00000007330 [*Nasonia vitripennis*]** | **3.38E-297** | **-2.32** |
| **NL24110b** | **-** | **-** | **5.02E-287** | **-2.74** |
| **NL00160b** | **gi|189242418|ref|XP_001811120.1|** | **PREDICTED: similar to DEAD box polypeptide 5 [*Tribolium castaneum*]** | **2.27E-276** | **-1.46** |
| **5th instar**  **/2nd instar** | **NL16490a** | **gi|221135713|ref|XP_002170981.1|** | **PREDICTED: similar to predicted protein, partial [*Hydra magnipapillata*]** | **0** | **3.06** |
| **NL05893a** | **gi|270003644|gb|EFA00092.1|** | **hypothetical protein TcasGA2_TC002907 [*Tribolium castaneum*]** | **0** | **3.05** |
| **NL24889a** | **-** | **-** | **0** | **2.81** |
| **NL16226a** | **gi|242022928|ref|XP_002431889.1|** | **U4/U6 small nuclear ribonucleoprotein Prp31, putative [*Pediculus humanus corporis*]** | **0** | **2.31** |
| **NL02110a** | **gi|193704781|ref|XP_001947706.1|** | **PREDICTED: similar to Putative pyridoxamine 5-phosphate oxidase, partial [*Acyrthosiphon pisum*]** | **0** | **2.14** |
| **NL00685a** | **gi|156891049|gb|ABU96701.1|** | **transferrin [*Rhodnius prolixus*]** | **0** | **2.13** |
| **NL00262a** | **-** | **-** | **0** | **2.02** |
| **NL24371a** | **-** | **-** | **0** | **1.80** |
| **NL21030a** | **gi|193610981|ref|XP_001949651.1|** | **PREDICTED: similar to Eip55E CG5345-PA, partial [*Acyrthosiphon pisum*]** | **0** | **1.76** |
| **NL29468a** | **-** | **-** | **0** | **1.73** |
| **NL14053b** | **gi|225347350|ref|YP_002640588.2|** | **cytochrome c oxidase subunit I [*Hydroscapha granulum*]** | **0** | **-16.05** |
| **NL16821b** | **gi|157326172|ref|YP_001468385.1|** | **cytochrome b [*Culicoides arakawae*]** | **0** | **-15.54** |
| **NL04454b** | **gi|193636635|ref|XP_001950829.1|** | **PREDICTED: similar to conserved hypothetical protein [*Acyrthosiphon pisum*]** | **0** | **-15.45** |
| **NL06133b** | **gi|118794438|ref|XP_321477.2|** | **AGAP001622-PA [*Anopheles gambiae str.* PEST]** | **0** | **-15.21** |
| **NL15564b** | **gi|158296157|ref|XP_316638.4|** | **AGAP006609-PA [*Anopheles gambiae str.* PEST]** | **0** | **-6.60** |
| **NL09289b** | **-** | **-** | **0** | **-4.35** |
| **NL07084b** | **-** | **-** | **0** | **-3.68** |
| **NL26619b** | **-** | **-** | **0** | 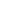**-3.42** |
| **NL00928b** | **gi|158295182|ref|XP_316061.3|** | **AGAP006023-PA [*Anopheles gambiae str.* PEST]** | **0** | **-3.27** |
| **NL16299b** | **gi|223671248|tpd|FAA00576.1|** | **TPA: putative cuticle protein [*Bombyx mori*]** | **0** | **-3.08** |
| **MFA**  **/BFA** | **NL00111a** | **gi|6688881|emb|CAB65310.1|** | **ferritin subunit (non-glycosylated) [*Nilaparvata lugens*]** | **0** | **3.28** |
| **NL01435a** | **gi|189239144|ref|XP_971313.2|** | **PREDICTED: similar to dihydrolipoamide succinyltransferase component of 2-oxoglutarate dehydrogenase [*Tribolium castaneum*]** | **0** | **2.81** |
| **NL02753a** | **gi|229892296|ref|NP_001153501.1|** | **oxoglutarate (alpha-ketoglutarate) dehydrogenase (lipoamide) [*Nasonia vitripennis*]** | **0** | **2.73** |
| **NL01739a** | **gi|270007569|gb|EFA04017.1|** | **hypothetical protein TcasGA2_TC014166 [*Tribolium castaneum*]** | **0** | **2.73** |
| **NL01029a** | **gi|263173502|gb|ACY69956.1|** | **mitochondrial phosphate carrier protein [*Cimex lectularius*]** | **0** | **2.49** |
| **NL00578a** | **-** | **-** | **0** | **2.28** |
| **NL00627a** | **gi|270014673|gb|EFA11121.1|** | **hypothetical protein TcasGA2_TC004721 [*Tribolium castaneum*]** | **0** | **2.20** |
| **NL22995a** | **-** | **-** | **0** | **2.17** |
| **NL00980a** | **gi|242006712|ref|XP_002424191.1|** | **Sarcalumenin precursor, putative [*Pediculus humanus corporis*]** | **0** | **2.04** |
| **NL29164a** | **-** | **-** | **0** | **2.04** |
| **NL00643b** | **-** | **-** | **0** | **-2.72** |
| **NL30565b** | **-** | **-** | **0** | **-2.57** |
| **NL00463b** | **-** | **-** | **0** | **-2.54** |
| **NL05048b** | **-** | **-** | **0** | **-2.34** |
| **NL01214b** | **-** | **-** | **0** | **-2.28** |
| **NL23336b** | **-** | **-** | **0** | **-2.13** |
| **NL05450b** | **-** | **-** | **0** | **-2.11** |
| **NL00460b** | **-** | **-** | **0** | **-2.06** |
| **NL00012b** | **gi|154799937|dbj|BAF75351.1|** | **vitellogenin [*Nilaparvata lugens*]** | **0** | **-1.97** |
| **NL01993b** | **gi|193587079|ref|XP_001947773.1|** | **PREDICTED: similar to pancreatic lipase related protein 1 [*Acyrthosiphon pisum*]** | **0** | **-1.93** |
| **MFA**  **/MMA** | **NL22066a** | **-** | **-** | **0** | **5.42** |
| **NL01090a** | **gi|242020998|ref|XP_002430934.1|** | **asparagine synthetase, putative [*Pediculus humanus corporis*]** | **0** | **3.62** |
| **NL00504a** | **gi|110777718|ref|XP_001121759.1|** | **PREDICTED: similar to 39 kDa FK506-binding nuclear protein (Peptidyl-prolyl cis-trans isomerase) (PPIase) (Rotamase) [*Apis mellifera*]** | **0** | **3.14** |
| **NL00414a** | **gi|193693000|ref|XP_001948416.1|** | **PREDICTED: similar to l-allo-threonine aldolase, partial [*Acyrthosiphon pisum*]** | **0** | **3.08** |
| **NL23063a** | **-** | **-** | **0** | **3.01** |
| **NL00345a** | **gi|66558956|ref|XP_392812.2|** | **PREDICTED: similar to Ribosomal protein L23 CG3661-PA [*Apis mellifera*]** | **0** | **2.77** |
| **NL00500a** | **gi|50344488|emb|CAH04330.1|** | **S14e ribosomal protein [*Dascillus cervinus*]** | **0** | **2.75** |
| **NL02005a** | **gi|193659748|ref|XP_001946449.1|** | **PREDICTED: similar to AGAP010399-PA [*Acyrthosiphon pisum*]** | **0** | **2.66** |
| **NL00982a** | **-** | **-** | **0** | **2.63** |
| **NL00290a** | **gi|90820018|gb|ABD98766.1|** | **putative ribosomal protein L27Ae [*Graphocephala atropunctata*]** | **0** | **2.60** |
| **NL01844b** | **-** | **-** | **0** | **-17.00** |
| **NL22094b** | **-** | **-** | **0** | **-16.71** |
| **NL01015b** | **gi|170317966|gb|ACB14344.1|** | **juvenile hormone esterase [*Nilaparvata lugens*]** | **0** | **-15.87** |
| **NL00642b** | **gi|15613784|ref|NP_242087.1|** | **hypothetical protein BH1221 [*Bacillus halodurans* C-125]** | **0** | **-15.87** |
| **NL02380b** | **gi|198460106|ref|XP_001361611.2|** | **GA12219 [*Drosophila pseudoobscura pseudoobscura*]** | **0** | **-15.78** |
| **NL01144b** | **-** | **-** | **0** | **-15.69** |
| **NL02327b** | **gi|170046819|ref|XP_001850946.1|** | **cytosol aminopeptidase [*Culex quinquefasciatus*]** | **0** | **-15.50** |
| **NL01912b** | **-** | **-** | **0** | **-15.46** |
| **NL01255b** | **-** | **-** | **0** | **-15.40** |
| **NL22130b** | **-** | **-** | **0** | **-15.31** |

**The corner marks of gene ID: ‘a’ represents up-regulated genes and ‘b’ represents down-regulated genes. The expression fold changes were performed with log 2 ratio.**
